# Supplementary material for: Increased Incidence of Melioidosis in Far North Queensland, Queensland, Australia, 1998–2019
Source: PubMed Central journal article supplement (PMC8632158; doi:10.3201/eid2712.211302), 2021-12
Supplement: 21-1302-Techapp-s1.pdf [file 21-1302-Techapp-s1.pdf]

# Increased Incidence of Melioidosis in Far North Queensland, Queensland, Australia, 1998–2019

## Appendix

**Appendix Table.** Changes in climatic features in Cairns area, Far North Queensland, January 1998–December 2019

| Variable                               | 1998–2002        | 2003–2007        | 2008–2011        | 2012–2015        | 2016–2019        | p*   |
|----------------------------------------|------------------|------------------|------------------|------------------|------------------|------|
| Rainfall, mean (95% CI)                | 164 (103–224)    | 160 (104–217)    | 202 (129–275)    | 146 (94–198)     | 157 (93–220)     | 0.61 |
| Temperature, mean (95% CI)             | 29.4 (28.9–29.9) | 29.2 (28.7–29.8) | 29.5 (28.9–30.0) | 29.5 (28.8–30.1) | 29.9 (29.2–30.5) | 0.32 |
| Cloud cover, mean (95% CI)             | 4.6 (4.1–5.0)    | 4.5 (4.0–4.9)    | 4.7 (4.2–5.1)    | 3.7 (3.2–4.1)    | 5.2 (4.3–6.1)†   | 0.13 |
| Dew point, mean (95% CI)               | 19.3 (18.4–20.3) | 19.7 (18.9–20.5) | 19.8 (18.9–20.7) | 18.9 (17.9–19.8) | 20.1 (19.1–21.0) | 0.93 |
| No. cyclones (within 200 km of Cairns) | 3                | 2                | 4                | 4                | 1                | 0.86 |

\*p for trend value calculated using annual data with year as a continuous variable.

†Some measurements of cloud cover missing from Cairns Aero Station located ≈7km from the center of Cairns City and taken from Cairns Racecourse Station located ≈4km from the center of Cairns City.
